# Supplementary material for: Graphene nano-floating gate transistor memory on plastic
Source: Royal Society of Chemistry journal article supplement (doi:10.1039/c4nr04117h), 2014-01-01
Supplement: c4nr04117h1.pdf [file c4nr04117h1.pdf]

## Supporting Information for

### Graphene Nano-floating Gate Transistor Memory on Plastic

*Sukjae Jang, Euyheon Hwang, and Jeong Ho Cho\**

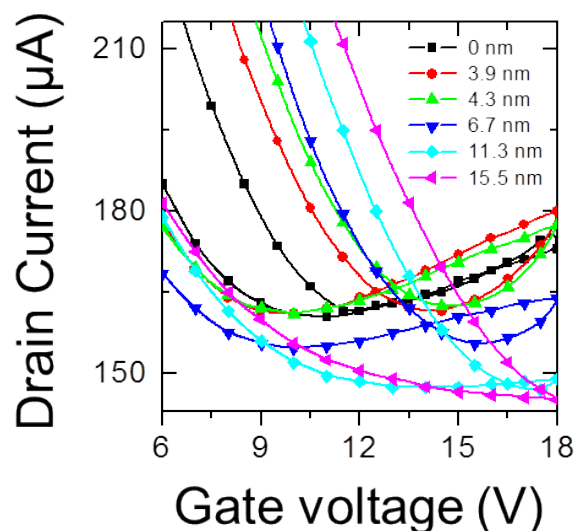

**Figure S1.** Magnified Memory hysteresis loop of the graphene NFGTMs based on various sizes of thermally-deposited Au NPs (cPVP thickness = 19 nm).

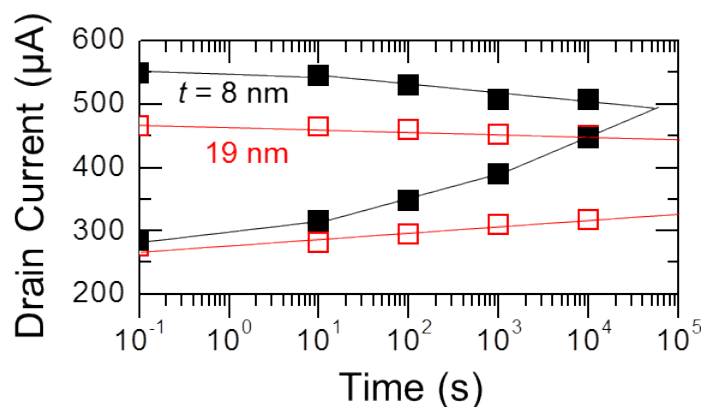

**Figure S2.** Retention time tests for the graphene NFGTMs based on cPVP tunneling dielectrics with thicknesses of 8 and 19 nm.
